# Supplementary material for: Indirect to direct bandgap transition in methylammonium lead halide perovskite
Source: Royal Society of Chemistry journal article supplement (doi:10.1039/c6ee03474h), 2016-12-09
Supplement: c6ee03474h1.pdf [file c6ee03474h1.pdf]

**Supplementary Information for:**

**Indirect to direct bandgap transition in methylammonium lead halide  
perovskite**

**Authors:** Tianyi Wang<sup>1†</sup>, Benjamin Daiber<sup>1†</sup>, Jarvist M. Frost<sup>2</sup>, Sander A. Mann<sup>1</sup>, Erik C.  
Garnett<sup>1</sup>, Aron Walsh<sup>2</sup>, and Bruno Ehrler<sup>1\*</sup>

**Affiliations:**

<sup>1</sup> Center for Nanophotonics, FOM Institute AMOLF, Science Park 104, 1098 XG Amsterdam,  
The Netherlands.

<sup>2</sup> Centre for Sustainable Chemical Technologies and Department of Chemistry, University of  
Bath, Claverton Down, Bath BA2 7AY, United Kingdom.

\*Correspondence to: [ehrlers@amolf.nl](mailto:ehrlers@amolf.nl)

†These authors contributed equally to the work.

**Table of content**

Methods

Figures S1-S23

References (S1-S31)

## Methods

### S1. Analysis of absorption spectra

Tauc plots are used to track the bandgap shifts of MAPI under pressure. Here we use the Tauc plots for direct bandgap semiconductors to fit the absorption spectrum as the direct transition is dominating the absorption for MAPI due to the high density of state in the valence band<sup>S1</sup>. The Tauc equation for direct bandgap semiconductors is written as:

$$\alpha h\nu = A(h\nu - E_G)^{1/2}$$

where  $\alpha$  is the absorption coefficient,  $h\nu$  is the photon energy,  $A$  is a constant and  $E_G$  is the bandgap. This analysis requires parabolic bands, which is a valid assumption for MAPI only very close to the (direct transition) absorption onset<sup>S2</sup>.

The absorption coefficient is calculated with the following equation:

$$\alpha = \left( \frac{2.303}{t} \right) * OD$$

Where  $t$  is the thickness of the film (400 nm), 2.303 is the conversion constant between  $\log(x)$  and  $\ln(x)$  and  $OD$  is the optical density (absorbance measured with UV/Vis spectroscopy).

We plot  $(\alpha h\nu)^2$  against photon energy. A straight line is fitted by minimizing the root mean square difference, to the linear region of the Tauc plots. Extrapolation of this straight line to the x-axis (photon energy) is taken as the bandgap. The quality of the fitting procedure is evaluated by a reduced chi squared metric. Fits with reduced chi squared between 0.95 – 1.00 are considered to be “good” fits. Fits to the linear region of the Tauc spectrum at all pressures fulfill this criteria. We define our error in the bandgap estimation as the standard error of the linear fit.

## S2. Fitting of steady-state PL spectra

Steady state PL spectra are measured as function of wavelength. For a quantitative analysis of the data, a Jacobian transformation of the spectra to an energy scale was performed following literature<sup>S3</sup>.

The PL spectra are best fitted with Voigt profiles<sup>S4</sup>, which include the contributions from both Gaussian and Lorentzian components. The Voigt profile is given by

$$P(x, y) = \frac{1}{w_G} \sqrt{\frac{\ln 2}{\pi}} K(x, y),$$

where  $K(x, y)$ , the so-called “Voigt function”, is given by

$$K(x, y) = \frac{y}{\pi} \int_{-\infty}^{\infty} \frac{\exp(-t^2)}{y^2 + (x - t)^2} dt$$

with  $x = \frac{v - v_0}{w_G} \sqrt{\ln 2}$ ,  $y = \frac{w_L}{w_G} \sqrt{\ln 2}$ , and where  $w_G$  and  $w_L$  are the half widths of the Gaussian and Lorentzian components respectively,  $v$  is the wave number, and  $v_0$  is the wave number at the line center.

The goodness of fit is evaluated by adjusted R squared (also known as coefficient of determination). Fits with adjusted R squared between 0.95 – 1.00 are considered to be “good” fits and all the Voigt fits for PL spectra fulfill this criterion. We define our error in the peak position as the standard errors of the Voigt fit.

The Voigt profile shape is chosen because it (a) offers the best description of the data since the emission broadening is a combination of homogeneous (Lorentzian) and inhomogeneous (Gaussian) broadening<sup>S5, S6</sup> and (b) is the most general curve shape, as it is a convolution of Gaussian and Lorentzian line shapes.

### S3. Estimation of Phonon energy

The phonon momentum can be calculated by assuming two parabolic bands that have a 60 meV difference from the  $k=0$  point and the band edge. The curvature of the parabolic bands is determined by the effective masses, taken from literature<sup>S7</sup>. The resulting wave vector is  $k=0.048 \text{ \AA}^{-1}$ . This value is comparable to  $k \sim 0.05 \text{ \AA}^{-1}$  from literature<sup>S8</sup>. To calculate the energy of an acoustic phonon with this wave vector we use the phonon dispersion relation<sup>S9</sup>;

$$\omega = 2\sqrt{\gamma/M} |\sin(ka/2)|$$

where  $\omega$  is the angular frequency,  $\gamma$  is the force constant,  $M$  is the mass of the unit cell,  $k$  is the phonon wave vector, and  $a$  is the lattice constant.

The force constant  $\gamma$  is connected to Young's modulus  $Y$  and the lattice parameter  $a$  via  $\gamma = Y \times a$ . The Young's modulus was derived from the phonon dispersion relation in literature<sup>S10</sup> and found to be  $Y=(13 \pm 2) \text{ GPa}$ . The lattice parameter is  $a=6.4 \text{ \AA}$ <sup>S11</sup>. The mass of the unit cell is the sum of all unit cell constituents. These values lead to a phonon energy of 0.6 meV, for a phonon with momentum such that the indirect transition can occur.

#### S4. Fit of photothermal deflection spectroscopy (PDS) data

To fit the photothermal deflection spectroscopy data, we use equations for the direct bandgap, the indirect bandgap, and the Urbach tail. We extracted the absorption data for MAPI from ref. S12 (Sadhanala et al.) using the website (<http://arohatgi.info/WebPlotDigitizer/>) (**Fig. S4**). As above, the data was then linearized according to the Tauc rule for both direct and indirect bandgaps:

$$\alpha h\nu = A(h\nu - E_G)^r$$

with the absorption coefficient  $\alpha$ , photon energy  $h\nu$ , the scaling constant  $A$ , the bandgap energy  $E_G$  and the coefficient  $r$  ( $r = 2$  for indirect allowed transition,  $r = 1/2$  for direct allowed transition)<sup>S13, S14</sup>. Then the linear region of the plot is identified and a straight line is fitted (with Mathematica 10.3.1 using LinearModelFit) (**Fig. S4**). The beginning of the absorbance can be fitted separately with an exponential, the Urbach tail, usually assigned to shallow traps and Gaussian disorder<sup>S15</sup>. The Urbach energy we extract is 21 meV, comparable to the 15 meV measured before<sup>S11, S16</sup>.

The dashed lines depict an attempt of fitting the whole bandedge with only a direct bandedge and an Urbach tail.

The fit with only a direct bandgap does not describe the data well, with non-Gaussian distributed residuals, which led us to the conclusion that an indirect bandgap is also supported from PDS absorption data.

Additional PDS data is also reported by Zhang et al.<sup>S17</sup>(**Fig. S5**) and de Wolf et al.<sup>S16</sup>(**Fig. S6**).

Both datasets are also consistent with an indirect bandgap, with a more dominant Urbach tail in the de Wolf et al. data (**Fig. S6**).

## S5. Elliott Fitting of direct exciton absorption

We fit the PDS data with the Tauc rule, which is inaccurate in the presence of an exciton<sup>S18</sup>. This chapter will investigate the possibility fitting the PDS data with a direct exciton following the Elliott formalism.

The theory predicting the absorption from a direct exciton has been pioneered by Elliott<sup>S19</sup> in 1957. Later work introduced an additional broadening of the hydrogen lines with various bell shaped curves. Distinct exciton absorption lines are predicted at energies lower than the band edge absorption. These exciton absorption peaks lie in an energy range we assign to the indirect free carrier absorption in our Tauc analysis. A more detailed investigation about the soundness of this competing explanation is therefore necessary. Following ref. S20, we use a secans hyperbolicus (Sech) as a broadening function for the exciton lineshape. In addition to the exciton absorption a continuum absorption is predicted, which is stronger than free carrier absorption (Tauc formalism) and shows a different functional dependence. Both the excitonic and continuum contribution are summed up to describe the complete band edge<sup>S21</sup> as

$$\begin{aligned}\alpha(\omega) &= const. \cdot \sqrt{E_b} \left[ \sum_n a_{nx} + a_{cont} \right] \\ &= const. \cdot \sqrt{E_b} \left[ \sum_n \frac{2E_b}{n^3} \operatorname{sech} \left( \frac{\hbar\omega - E_{nx}}{\Gamma} \right) \right. \\ &\quad \left. + \int_{E_g}^{\infty} \operatorname{sech} \left( \frac{\hbar\omega - E}{\Gamma} \right) \frac{1 + \frac{10m^2}{\hbar^4} E c_{np} + \left( \frac{\sqrt{126}m^2}{\hbar^4} E c_{np} \right)^2}{1 - \operatorname{Exp} \left[ -2\pi \sqrt{\frac{E_b}{E - E_g}} \right]} dE \right]\end{aligned}$$

where  $\alpha$  is the absorbance,  $\omega$  the angular frequency of the absorbed light,  $const.$  is a constant containing the transition dipole moment,  $E_b$  the exciton binding energy,  $n$  the order of exciton state,  $\alpha_{nx}$  is the absorption from the  $n$ -th excition state,  $\alpha_{cont}$  is the absorption from the exciton continuum states,  $\hbar$  reduced planc constant,  $E_{nx} = E_g - (E_b/n^2)$  with  $E_g$  the bandgap energy,  $\Gamma$  the line width of the sech function,  $m$  the electron mass and  $E$ , the energy integral variable. The integral represents the convolution of the Sech lineshape with the continuum term. The parameter  $c_{np}$  is a correction factor that accounts for a possible deviation from parabolic bands. The parameter should be small, otherwise the Taylor expansion used in the derivation<sup>S22</sup> is no longer valid. Sestu *et al.*<sup>S20</sup> reports a value of  $0.1 \text{ eV}^{-1}$  for  $\frac{m^2}{\hbar^4} c_{np}$ .

We perform a fit on the PDS data reported by Sadhanala *et al.*<sup>S12</sup>. In order to fit the absorption edge the weights are chosen as  $1/\alpha$ . We describe the exponential onset of the absorption data with the exponential Urbach tail (See **Fig. S11**) instead of the Elliott fit. In the high energy range above 2.5 eV the absorption deviates from the continuum shape, we therefor only fit until 2.5 eV. The data range used in the fit is indicated by the dashed lines in **Fig. S11**. The fit is global in the sense that exciton and continuum absorption function share the values for the binding energies and the peak broadening. Only the first exciton line is considered, higher order excitons are already overlapping with the continuum absorption and are also of negligible contribution ( $\alpha \propto n^{-3}$ ). **Fig. S11** shows the fit and the constituents of the fit. The fit is describing the data reasonably well. The values the fit produced for the binding energy are reasonable (26 meV) especially considering the vast discrepancy of binding energies in literature<sup>S23</sup>. The exciton peak is very broad, with a FWHM of 50meV. The non-parabolic correction parameter  $\frac{m^2}{\hbar^4} c_{np}$  is  $-0.015 \text{ eV}^{-1}$  which is one order of magnitude smaller than in reference S20, indicating no significant deviation from parabolic bands. At the band edge we find a systematic deviation

between the fit and the data. In the area where the exciton absorption overlaps with the continuum absorption (around 1.58 eV) the Elliott formula predicts a drop in absorption which is not represented in the data. We can also see this deviation from the respective residuals, shown in **Fig. S11**.

We compare the quality of the Elliott formula fit with the indirect free carrier absorption by comparing the standardized residuals of both fits. To do so we have to calculate the standardized residuals of the Tauc fit for the direct and indirect part by dividing each residual by the standard deviation of the residuals in the energy range used for the fit, shown in Figure S11, bottom. As in the Elliott fit, the Urbach tail is used to describe the energy range below 1.51 eV, the indirect bandgap absorption describes the data in the range until 1.6 eV and the direct bandgap absorption is used to describe the data above that. Both the Elliott and Tauc fit show slightly non-random residuals, but the Tauc fit residuals are an order of magnitude smaller than in the Elliott formula fit, despite using one fewer free parameter.

In an attempt to improve the Elliott fit in the region around the band edge we manually changed the broadening parameter  $\Gamma$  to 16 meV. The broadening parameter determines the slope of the exciton contribution (amongst its contribution to the continuum broadening). We can now fit the remaining parameters with Mathematica's NonLinearModelFit (,  $E_b=29$  meV;  $E_g=1.6$  eV, Scaling = 9.4;  $\frac{m^2}{\hbar^4} c_{np} = 0.00021$  eV<sup>-1</sup>). This method yields smaller residuals around the bandgap and larger residuals elsewhere (Figure S11 bottom right). Even at the band-edge, the residuals remain considerably larger than those from the Tauc formalism with indirect and direct bandgap. This shows that excitonic effects alone do not fit the band-edge as well as an indirect bandgap fit.



We further show that excitonic processes, while present, are insufficient to describe our pressure-dependent data. We estimate below that the exciton binding energy does not change significantly over pressure, while the optoelectronic properties of MAPI change dramatically.

We extract the change in exciton binding energy from our UV-Vis absorption measurements. The data is compatible with no change (see **S9** below and **Fig. S8**, upper bound 26% relative change), and also shows no change in behavior across the phase transition at 325 MPa. Since MAPI shows drastic changes in optoelectronic behavior (PLQY, lifetime, bandgap position) over pressure and across the phase transition, we believe an explanation including excitons alone is unlikely, contrasted with a straightforward explanation employing the indirect bandgap induced by Rashba splitting.

## **S6. Analysis of TCSPC data**

First the differential equation relating the decay of charge carrier density and the bimolecular (assumed radiative) and monomolecular (assumed non-radiative) decay is solved (see **Equation 1** of the main text). This model does not include Auger recombination, since this contribution is negligible, as shown below. This model assumes that an equal amount of electrons and holes are generated upon photoexcitation, and that the excitation leads to a much higher charge carrier density than the intrinsically available charge carrier density. Both electrons and holes are treated as equivalent charge carriers since in MAPI perovskites mobility of holes and electrons is comparable<sup>S24</sup>. We normalize the data at  $t = 0$  and set the boundary condition for the charge carrier density in the fit accordingly to

$$n(t = 0) = n^0 = 1/cm^3.$$

An alternative approach would be to use  $n(t=0)=n^0$  as a fit parameter. However, this leads to the problem that  $n^0$  and  $k_R$  are only weakly independent and therefore cannot be fitted independently. The fit then shows varying  $n^0$  at different pressure values, which is unphysical.

We assume a consistent  $n^0$  across all pressures. This implies that the initial charge carrier density is constant across different pressures, assuming that the laser fluence and the absorption are constant. We confirmed that the laser power at the sample was constant (within <5 %, see below), therefore the number of photo-induced charge carriers should not change significantly either. The pressure liquid (Fluorinert FC-72, 3M) becomes slightly translucent at around 300 MPa which could lead to a decreased laser power at the sample, therefore to a decrease in charge carrier density. However, by placing a silicon photodiode inside the pressure cell we found that the power variation under pressure is smaller than 5% across the entire range from 0 MPa to 400 MPa. We assume that the absorption efficiency of the excitation laser by MAPI is independent of pressure, as the change to the physical structure and therefore electronic structure is a small perturbation, until the phase transition to the orthorhombic form.

The solution to Equation 1 in the main text describes the charge carrier decay as a function of time:

$$n(t) = \frac{k_{NR}n^0}{e^{k_{NR}t(k_{NR}+n^0k_R)-n^0k_R}}$$

(Units:  $k_{NR} \rightarrow \frac{1}{s}$ ,  $k_R \rightarrow \frac{cm^3}{s}$ ),  $n(t=0) = n^0 = 1/cm^3$ . Photoluminescence (PL) requires radiative recombination of two charge carriers, therefore the PL signal is proportional to  $n^2$ . This is based on the assumption that monomolecular recombination is (mostly) non-radiative. Since our data is well fitted by this model, and it is also reported for MAPI that dark trap states are responsible for monomolecular recombination<sup>S25</sup>, this assumption is valid:

$$Pl(t) = An(t)^2 + background$$

The proportionality factor  $A$  includes the number of generated photons (dependent on the charge carrier density  $n^0$ ) and the outcoupling efficiency. The sum of  $A$  and the background is described by the height of the PL decay curve at  $t = 0$  in our model with normalized  $n^0$ . The background is determined independently by fitting the average of the datapoints before the excitation pulse. The Instrument Response Function (IRF) at 640 nm has a FWHM of 1 ns, so to exclude any effects of the IRF on our analysis we start fitting from 1 ns onwards. Fitting uses the NonLinearFit function in Mathematica 10.3. This algorithm minimizes the Chi-squared value to find the best fit while using  $1/cts$  as weighing factor since  $\sqrt{cts}$  is the error on (Poisson-distributed) counting data. The Chi-squared method assumes that the datapoints are scattered around the “real” curve following a normal distribution. As we are *counting* photons in photoluminescence measurements, the real scatter histogram follows a Poisson distribution. If the mean of a Poisson distribution is sufficiently high (conventionally  $\mu > 10$ ) it can be approximated by a normal distribution. We implement this by fitting the data only until the intensity has reached background + 15 counts. In this range the residuals should follow the normal distribution in good approximation. This null hypothesis is then tested with a Cramér-von Mises test, resulting in a reliable goodness of fit measure for our highly nonlinear model (Chi-Squared reduced close to 1 should not be used with nonlinear models as shown in literature<sup>S26</sup>. The p-values of the Cramer-Von Mises test are shown in **Fig. S12**, all but three have a significance level  $P > 0.05$ . Residuals of the three fits with  $P < 0.05$  are included in **Fig. S12** and show no structure but a few outliers producing the low P-Values, hence the fit can also be accepted in those cases. The results of the fitted parameters can be found in the main text.

We define the radiative efficiency as follows:

$$\theta_{Rad} = \frac{\text{chargecarriersdecayedbimolecularly}}{\text{alldecayedchargecarriers}} = \frac{\int_{t=0}^{\infty} k_{bi}n(t)^2 dt}{\int_{t=0}^{\infty} [k_{bi}n(t)^2 + k_{mono}n(t)] dt}$$

Similarly, the fraction of charge carriers decayed non-radiatively is defined as

$$\theta_{NonRad} = \frac{\int_{t=0}^{\infty} k_{mono}n(t) dt}{\int_{t=0}^{\infty} [k_{bi}n(t)^2 + k_{bi}n(t)] dt}$$

while  $\theta_{NonRad} + \theta_{Rad} = 1$ . Both values are plotted in **Fig. 2C** of the main text.

**On Auger recombination:** To determine the influence of Auger recombination ( $\propto n^3$ ) and to show that the two-process model used here is sufficient, we carried out TCSPC measurements at different excitation densities. At 0 MPa, we varied the laser power by one order of magnitude compared to the other measurements. Since Auger recombination is a fast process it would be visible in the onset of the decay, rising with the cube of the excitation density. As seen in **Fig. S13**, no evidence is shown for Auger recombination in our TCSPC measurements.

**Influence of charge carrier density:** The increased radiative efficiency we observe could also arise through higher charge carrier densities, as discussed in literature<sup>S27, S28</sup> and from the dependence of  $\theta_{Rad}$  which increases with charge carrier density. The laser power was held constant (variation <5%, photodiode measurement, see above) during the measurement and the sample was fixed in a sample holder, restricting movement and therefore fixing the incoming laser power density. To show that even large variations in charge carrier densities do not lead to our observed simultaneous increase in  $k_{mono}$  and  $k_{bi}$  we fitted the TCSPC data where we changed the laser intensity with the model assuming constant laser power. This shows an increase in  $k_{bi}$  (**Fig. S14**) but a stable  $k_{mono}$  (**Fig. S15**) with increasing laser power, different from the trend in the pressure TCSPC experiment. The apparent increase in  $k_{bi}$  extracted from the fit is due to the fast radiative component becoming more important with higher charge carrier density and the

model can only increase the value of  $k_{bi}$  to optimize the fit when the amplitude is fixed. A decrease in charge carrier density over pressure would lead to a decrease in radiative efficiency, opposite to the trend of increasing radiative efficiency in the pressure measurement. If we take the model with varying initial charge carrier density and fit the data with  $n_0$  as the only fitting parameter, (holding  $k_{mono}$  and  $k_{bi}$  constant), we are able to fit the data taken at different excitation densities (**Fig. S16**).

### ***Absorbed charge carrier density:***

To calculate the charge carrier density we place a power meter at the same position as our film inside the pressure cell and extract a total power of  $37\mu\text{W}$ . To calculate the power density, we replace the power meter with a beam profiler (Thorlabs BC106N-VIS/M, **Fig. S17**). We measure a peak power density of  $62\text{ mW/cm}^2$ , at which we observe a radiative efficiency of 20 % at ambient pressure. This is in agreement with a PLQE of <40 % at fluences of around  $50\text{ mW cm}^{-2}$  reported in literature<sup>S28</sup>.

The repetition rate of excitation is 5 MHz, resulting in a excitation energy of  $12.4\text{ nJ/cm}^2$  per pulse. To calculate the charge carrier density we use:

$$n_{initial} = \frac{PowerDensity * Absorbance(640nm)}{E_{photon}(640nm) * d_{sample}} * geometryfactor$$

With the measured power density, absorbance of MAPI at 640 nm, the energy of a photon at 640 nm, the thickness of the sample  $d_{sample} = 400\text{ nm}$  and a geometry factor, which accounts for the additional refraction because we measured the beam profile in air and not in liquid as in the pressure experiment, and the fact that we measured at  $45^\circ$  sample to beam orientation. For the calculation of the geometry factor the beam is first propagated until it hits the silica window where the size can be calculated from the distance and the focal length of the lens.

The beam is then refracted twice, once at the air-silica and then at the silica-liquid interface. The beam is then propagated to the sample, where the beam radius is calculated again. This results in a ratio of the squares of these radii of 2.14. In addition, the sample is tilted by  $45^\circ$  from the incoming beam during the pressure measurement, so we add a factor of  $\cos(45^\circ)$  resulting in a total geometry factor of 1.51.

This leads to an initial charge carrier density of  $6.05 \times 10^{14} \text{ cm}^{-3}$ .

**Comparison with literature values for the rate constants:** Wehrenfennig et al. carried out a measurement of the rate constants at ambient pressure on films of the same material using THz techniques<sup>S28</sup>. We compare this with our measurement at 0 MPa. Wehrenfennig et al. measured at charge carrier densities of  $10^{17}$ - $10^{19} \text{ cm}^{-3}$ , considerably higher than our density of  $10^{14} \text{ cm}^{-3}$ . They report a non-radiative recombination rate of  $14 \mu\text{s}^{-1}$ , whereas we measure  $(20.0 \pm 0.2) \mu\text{s}^{-1}$ , with the error derived from the fit. They report a radiative recombination rate of  $k_{bi}^{lit.} = 9.2 \times 10^{-10} \text{ cm}^3 \text{ s}^{-1}$ . Our calculation is using an initial charge carrier density of unity ( $1 \text{ cm}^{-3}$ ). Therefore  $k_{bi}^{Real} = \frac{k_{bi}^{fit}}{n(t=0)}$ , here  $(1.85 \pm 0.05) \times 10^{-8} \text{ cm}^3 \text{ s}^{-1}$ , around 20 times higher than reported by Wehrenfennig et al. The vastly different excitation densities<sup>S8</sup> as well as the different techniques (TCSPC vs. THz photoconductivity measurements) and batch-to-batch variations might explain the difference.

## S7. Determination of PLQY

We used an integrating sphere setup to estimate the photoluminescence quantum yield of the identical MAPI film used in the main text. We determine the absorbed power and the luminescence directly, by using a photodetector combined with a long-pass filter (for

photoluminescence). The experimental approach is based on an experimental setup described by Mann *et al.*<sup>S29</sup>, inspired by Leyre *et al.*<sup>S30</sup>. Here, the absorptance  $A$  is determined as:

$$A = 1 - \frac{P_{hit}}{P_{miss}},$$

where  $P_{hit}$  and  $P_{miss}$  are the power on the integrating sphere photodetector behind a short-pass filter, when the beam hits or misses the sample, respectively. The photoluminescence is determined by repeating the measurement, but now with a long-pass filter. Using a calibrated photodiode the collection efficiency of the integrating sphere and the excitation power are determined, which allows us to determine the PLQY:

$$PLQY = \frac{P_{PL}}{CA}$$

where  $P_{PL}$  is the photodetector signal due to photoluminescence, and  $C$  is the collection efficiency calibration factor. The results are shown in **Fig. S7**.

The excitation power is varied by modifying the transmission of an acousto-optic tunable filter (see below), while the normalization to suns is performed by converting the incident power to a power density. The area of the spot is determined using a knife edge measurement, and the incident flux density is normalized to the above band gap photon flux in the solar spectrum.

The errorbars are due to systematic and random errors. The systematic error is estimated from a calibration measurement on R6G+ dye and is 9 %<sub>rel</sub>, while the random error is only significant at low intensities.

## S8. Different methods for MAPI thin film preparation and their corresponding PL spectra

To investigate the influence of trap states, impurities, and morphological changes induced by different sample preparation methods, we prepared MAPbI<sub>3</sub> thin films with various methods, namely spincoating with and without antisolvent precipitation, solution casting, and two-step dipping (lead iodide (PbI<sub>2</sub>) used as lead precursor for all methods mentioned above) and spincoating using lead acetate (PbAc<sub>2</sub>) as lead precursor. All operations were performed in a nitrogen-filled glovebox unless specified. All PL measurements were performed under the same experimental condition as described in the main text unless mentioned specifically.

For spincoating with antisolvent precipitation, the procedure was described in the Methods section of the main text. We repeat the preparation method described in the main text to estimate the sample-to-sample variation. Additionally, we prepare the same sample in air without changing other parameters. The sample prepared in nitrogen atmosphere shows a PL spectrum with a clear side peak (see **Fig. S18**), which is comparable to the PL spectrum shown in the main text. The sample prepared in air also shows the sidepeak PL spectrum, yet with lower intensity (see **Fig. S18**).

For solution casting, 100  $\mu$ L of hot (100 °C) MAPI solution (37 %, wt.) in DMF with a molar ratio of 1:1 between PbI<sub>2</sub> and MAI was deposited on top of fused silica substrate that was placed on a hotplate at 100 °C under nitrogen atmosphere for 30 min. The PL spectrum of solution-cast sample is shown in **Fig. S19**, where a clear side peak is also visible.

For using PbAc<sub>2</sub> as lead precursor, PbAc<sub>2</sub> and methylammonium iodide (MAI) were dissolved in DMF with a molar ratio of **1:3** at 100 °C to obtain a 1M solution of MAPI. The solution was then spincoated onto fused silica substrates at 2000 rpm for 45 seconds. Then the sample is left to dry at room temperature for 10 min. The dried sample was transferred to a hotplate and annealed at



100 °C for 10 min. The sample prepared with PbAc<sub>2</sub> also shows an asymmetric PL spectrum (see **Fig. S20**) and two peaks are needed for a good fit of the spectrum.

For the two-step dipping method, we prepare a PbI<sub>2</sub> solution by dissolving PbI<sub>2</sub> (Sigma Aldrich, 99.999%) in DMF by stirring it at 70°C overnight. The PbI<sub>2</sub> solution was filtered through a 0.2 µm PTFE filter to obtain a clear solution. This PbI<sub>2</sub> solution was spun on a pre-heated (50°C) silica slide at 4000 rpm for 5 s. The PbI<sub>2</sub> covered slide was then dipped in 15 ml of homemade MAI solution<sup>S31</sup> (10 mg/ml in IPA) for 10 min. After 30 s a black film, consisting of micron sized crystallites (see **Fig. S21**), is formed. The PL spectrum of the dipping sample (see **Fig. S22**) also shows an asymmetric shape and can only be well fitted with two peaks.

The samples prepared with these different methods all exhibit asymmetric PL spectra, indicating that the PL side peak should not solemnly be a result of effects induced by sample preparation. The slight differences in energy and the differences in ratio between main and side peak might arise from different doping levels induced by different preparation methods, and are an interesting subject of future research.

To further confirm the trend that we observed under pressure in the main text and to exclude the influence of spatial confinement, the pressure-dependent PL spectra of the dipping sample was measured. The dipping sample is loaded into the pressure cell inside a nitrogen glovebox. The pressure cell is filled with Fluorinert FC-72 which was bubbled with N<sub>2</sub> for 2 min to drive out oxygen. The sample therefore never came into contact with oxygen which allows us to verify that the side peak and trend over pressure is not caused by oxidation. The pressure experiment was done at a slightly higher excitation power (3 mW) compared to the excitation in the main text because of the smaller film thickness. We see the same trend in the shift of PL peak positions and the ratio between main and side peaks (see **Fig. S22 and S23**), indicating that the

effect that we observe is not sensitive to spatial confinement, oxygen, and is reproducible for a sample prepared by a different method.

### S9. Exciton binding energy under pressure

The influence of excitonic behavior is investigated as a possible explanation of the PL side peak. One could conceive that under pressure, restricted movement of the methylammonium ions could lead to a change in exciton binding energy, leading to the changes in optoelectronic behavior we observe. The absorbance data (**Fig. 1A**) is analyzed for a change in excitonic peak height using the Elliott formula<sup>S23</sup>. We see no change in exciton binding energy within the error of the measurement (26% relative error) (**Fig. S8**). The energy difference between main and side peak of ~60 meV also stands in contrast to reported exciton binding energies of ~10 meV, now generally accepted in the field<sup>S28</sup>.

Absorption data can be described by contributions of an excitonic peak and a band continuum<sup>S20</sup>.

$$\alpha(E) \propto \mu_{cv}^2 \sqrt{E_B} \left( \sum_n \alpha_{nx} + \alpha_c \right)$$

where  $\mu_{cv}^2$  is the transition dipole moment,  $E_B$  is the exciton binding energy,  $\alpha_{nx}$  is the absorption from the n-th exciton, and  $\alpha_c$  is the continuum absorption. We consider the ratio of absorbance at the excitonic peak of the i-th pressure measurement ( $\alpha_i$ ) with the ambient pressure measurement ( $\alpha_0$ ):

$$\frac{\alpha_i}{\alpha_0} = \frac{\mu_{cv}^2 \sqrt{E_{Bi}} (\sum_n \alpha_{nx} + \alpha_c)}{\mu_{cv}^2 \sqrt{E_{B0}} (\sum_n \alpha_{nx} + \alpha_c)} = \frac{\sqrt{E_{Bi}} (\sum_n \alpha_{nx} + \alpha_c)}{\sqrt{E_{B0}} (\sum_n \alpha_{nx} + \alpha_c)}$$

To calculate an upper bound of change in exciton binding energy we assume a strong continuum contribution, and consider the limit of  $\alpha_c \rightarrow \infty$ . This limit leads to:

$$\frac{\alpha_i}{\alpha_0} = \frac{\sqrt{E_{Bi}}}{\sqrt{E_{B0}}} \Rightarrow \frac{E_{Bi}}{E_{B0}} = \left(\frac{\alpha_i}{\alpha_0}\right)^2$$

To get the value of  $\frac{\alpha_i}{\alpha_0}$ , we determine the maxima of the excitonic peak. To show the excitonic peak more clearly than in **Fig. 1A** we treat the data. We fit a linear equation to the low wavelength realm in the data of **Fig. 1A** for every curve and subtract the respective line from the data (**Fig. S8**)

We use the function Lowpass in Mathematica 10.3 to filter the noise and extract the maximum peak value for each pressure point seen in **Fig. S8**. We then calculate the change in exciton binding energy from the peak absorbance data points (**Fig. S8**). The upper bound for the increase in exciton binding energy is 26% with a large standard deviation of 11% also represented in the large error bars. Error bars are taken from the standard deviation of the noise, propagated via a Gaussian error propagation according to the formula above.

## References

- S1. J. Tauc, *Materials Research Bulletin*, 1968, **3**, 37-46.
- S2. F. Brivio, K. T. Butler, A. Walsh and M. van Schilfgaarde, *Physical Review B*, 2014, **89**.
- S3. J. Mooney and P. Kambhampati, *The Journal of Physical Chemistry Letters*, 2013, **4**, 3316-3318.
- S4. B. H. Armstrong, *Journal of Quantitative Spectroscopy and Radiative Transfer*, 1967, **7**, 61-88.
- S5. A. D. Wright, C. Verdi, R. L. Milot, G. E. Eperon, M. A. Pérez-Osorio, H. J. Snaith, F. Giustino, M. B. Johnston and L. M. Herz, *Nature Communications*, 2016, **7**, 0.
- S6. C. Wehrenfennig, M. Liu, H. J. Snaith, M. B. Johnston and L. M. Herz, *The Journal of Physical Chemistry Letters*, 2014, **5**, 1300-1306.
- S7. J. M. Frost, K. T. Butler, F. Brivio, C. H. Hendon, M. van Schilfgaarde and A. Walsh, *Nano Letters*, 2014, **14**, 2584-2590.
- S8. P. Azarhoosh, S. McKechnie, J. M. Frost, A. Walsh and M. van Schilfgaarde, *APL Materials*, 2016, **4**, 091501.
- S9. C. Kittel, *Introduction to Solid State Physics. John Wiley and Sons, Inc., New York*, **8th edition**, 2005.
- S10. Beecher, A. N. *et al.* The cubic phase of methylammonium lead iodide perovskite is not locally cubic. 1–10 (2016).
- S11. Oku, T. *Sol. Cells - New Approaches Rev.* 2015, 77–101. doi:10.5772/58490

- S12. A. Sadhanala, F. Deschler, T. H. Thomas, S. E. Dutton, K. C. Goedel, F. C. Hanusch, M. L. Lai, U. Steiner, T. Bein, P. Docampo, D. Cahen and R. H. Friend, *Journal of Physical Chemistry Letters*, 2014, **5**, 2501-2505.
- S13. J. Tauc, R. Grigorovici and A. Vancu, *physica status solidi (b)*, 1966, **15**, 627-637.
- S14. E. A. Davis and N. F. Mott, *Philosophical Magazine*, 1970, **22**, 0903-0922.
- S15. S. John, C. Soukoulis, M. H. Cohen and E. N. Economou, *Physical Review Letters*, 1986, **57**, 1777-1780.
- S16. S. De Wolf, J. Holovsky, S. J. Moon, P. Loper, B. Niesen, M. Ledinsky, F. J. Haug, J. H. Yum and C. Ballif, *The Journal of Physical Chemistry Letters*, 2014, **5**, 1035-1039.
- S17. W. Zhang, M. Saliba, D. T. Moore, S. K. Pathak, M. T. Horantner, T. Stergiopoulos, S. D. Stranks, G. E. Eperon, J. A. Alexander-Webber, A. Abate, A. Sadhanala, S. Yao, Y. Chen, R. H. Friend, L. A. Estroff, U. Wiesner and H. J. Snaith, *Nature Communications*, 2015, **6**, 6142.
- S18. M. A. Green, Y. J. Jiang, A. M. Soufiani and A. Ho-Baillie, *Journal of Physical Chemistry Letters*, 2015, **6**, 4774-4785
- S19. R. J. Elliott, *Physical Review*, 1957, **108**, 1384-1389
- S20. N. Sestu, M. Cadelano, V. Sarritzu, F. Chen, D. Marongiu, R. Piras, M. Mainas, F. Quochi, M. Saba, A. Mura and G. Bongiovanni, *The Journal of Physical Chemistry Letters*, 2015, **6**, 4566-4572.
- S21. R. G. Glinsk, K. S. Song and J. C. Woolley, *Physica Status Solidi (b)*, 1971, **48**, 815-822.
- S22. M. Cadelano, PhD thesis, UNIVERSITÀ DEGLI STUDI DI CAGLIARI, 2016.
- S23. L. M. Herz, *Annual Reviews of Physical Chemistry*, 2016, **67**, 65-89.

- S24. C. Motta, F. El-Mellouhi and S. Sanvito, *Scientific Reports*, 2015, **5**, 12746.
- S25. G.-J. A. H. Wetzelaer, M. Scheepers, A. M. Sempere, C. Momblona, J. Ávila and H. J. Bolink, *Advanced Materials*, 2015, **27**, 1837-1841.
- S26. R. Andrae, T. Schulze-Hartung, P. Melchior, Dos and don'ts of reduced chi-squared, 2010, arXiv:1012.3754v1
- S27. F. Deschler, M. Price, S. Pathak, L. E. Klintberg, D. D. Jarausch, R. Higler, S. Huttner, T. Leijtens, S. D. Stranks, H. J. Snaith, M. Atature, R. T. Phillips and R. H. Friend, *The Journal of Physical Chemistry Letters*, 2014, **5**, 1421-1426.
- S28. C. Wehrenfennig, G. E. Eperon, M. B. Johnston, H. J. Snaith and L. M. Herz, *Advanced Materials*, 2014, **26**, 1584-1589.
- S29. S. A. Mann, S. Z. Oener, A. Cavalli, J. E. M. Haverkort, E. P. A. M. Bakkers and E. C. Garnett, *Nature Nanotechnology*, 2016, **advance online publication**.
- S30. S. Leyre, E. Coutino-Gonzalez, J. J. Joos, J. Ryckaert, Y. Meuret, D. Poelman, P. F. Smet, G. Durinck, J. Hofkens, G. Deconinck and P. Hanselaer, *Review of Scientific Instruments*, 2014, **85**, 123115.
- S31. G. W. P. Adhyaksa, L. W. Veldhuizen, Y. Kuang, S. Brittman, R. E. I. Schropp and E. C. Garnett, *Chemistry of Materials*, 2016, **28**, 5259-5263.

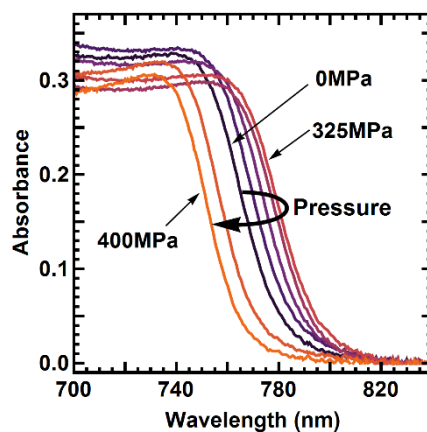

**Fig. S1.** Absorbance Spectra at different pressures, from dark to light: 0 MPa, 100 MPa, 200 MPa, 300 MPa, 325 MPa, 350 MPa, 400 MPa.

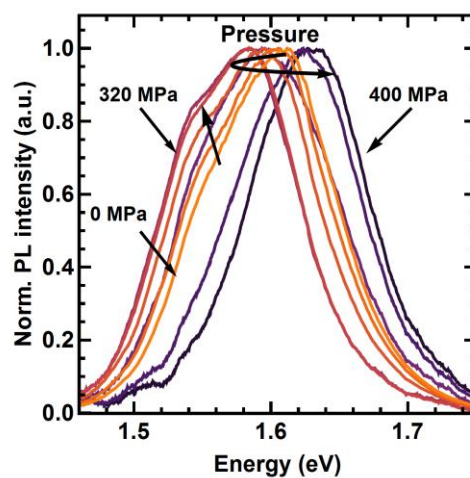

**Fig. S2.** Normalized steady-state PL spectra at different pressure, from dark to light: 0 MPa, 100 MPa, 200 MPa, 300 MPa, 320 MPa, 350 MPa, 400 MPa.

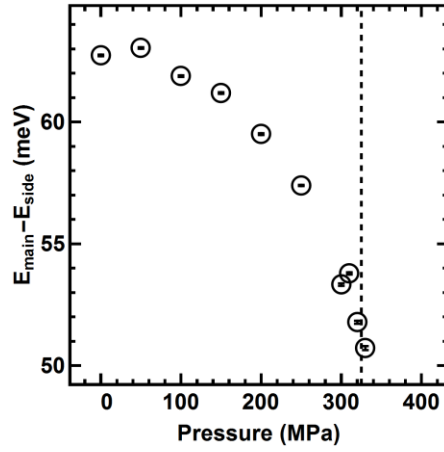

**Fig. S3.** Difference in the PL peak position between the main and the side peak.

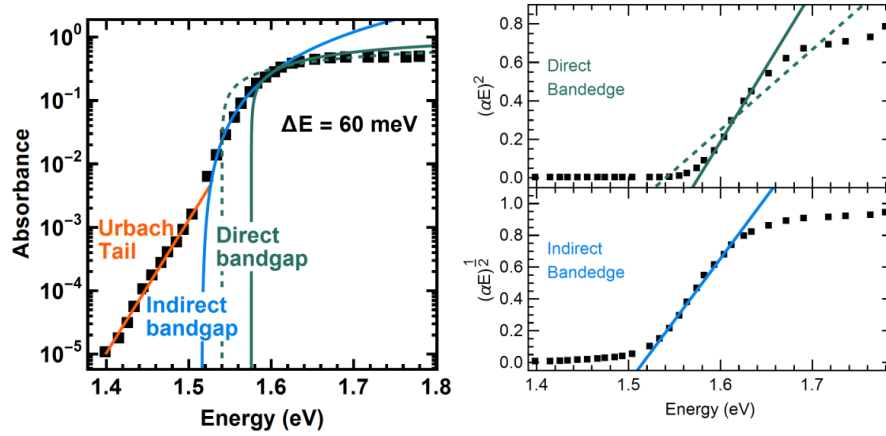

**Fig. S4 Left:** PDS data from Sadhanala et al.<sup>S9</sup> fit with an exponential Urbach tail (orange) and indirect (blue) and direct (green) bandgaps. A fit of only a direct bandgap and Urbach tail is shown in dashed green. The energy distance between direct and indirect bandgap is 60 meV. **Right:** Linearized data according to tauc rule with linear fits.



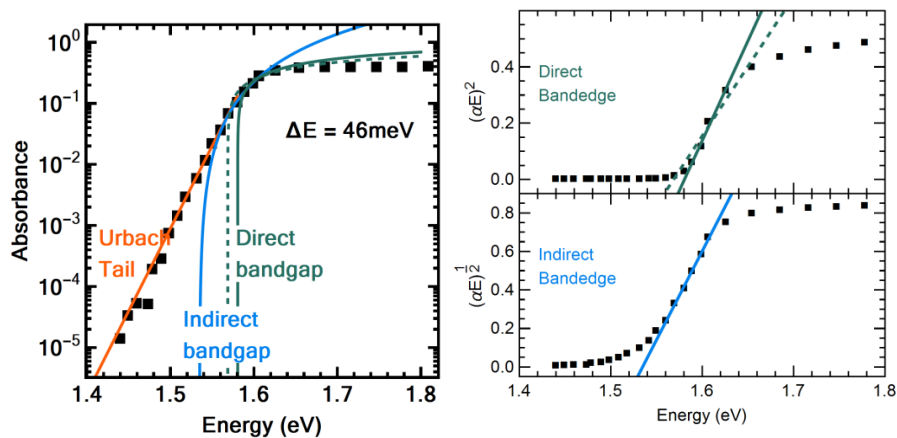

**Fig. S5 Left:** PDS data from de Wolf et al.<sup>S13</sup> fit with an exponential Urbach tail (orange) and indirect (blue) and direct (green) bandgaps. A fit of only a direct bandgap and Urbach tail is shown in dashed green. The energy distance between direct and indirect bandgap is 46 meV. A large Urbach tail overlaps with the indirect bandgap.

**Right:** Linearized data according to tauc rule with linear fits.

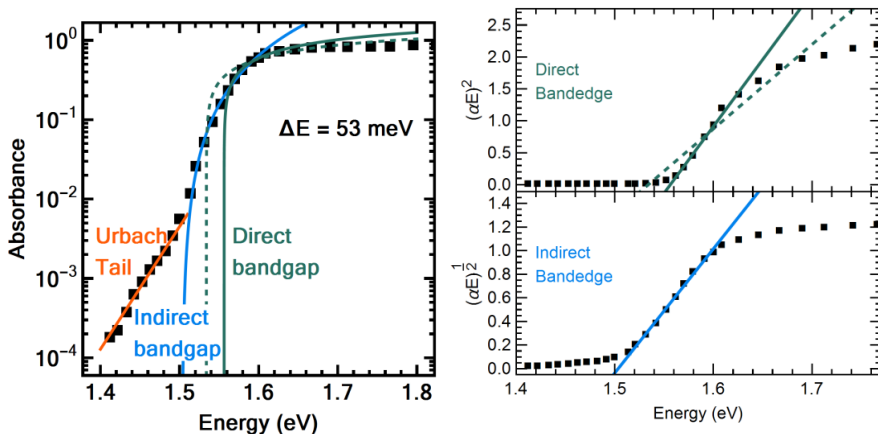

**Fig. S6 Left:** PDS data from Zhang et al.<sup>S14</sup> fit with an exponential Urbach tail (orange) and indirect (blue) and direct (green) bandgaps. A fit of only a direct bandgap and Urbach tail is shown in dashed green. The energy distance between direct and indirect bandgap is 53 meV.

**Right:** Linearized data according to tauc rule with linear fits.

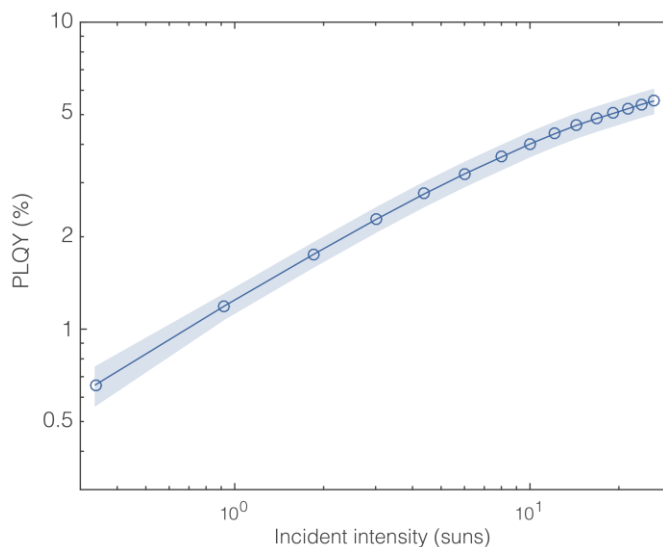

**Fig. S7.** Photoluminescence quantum yield (PLQY) of MAPI film under various excitation densities

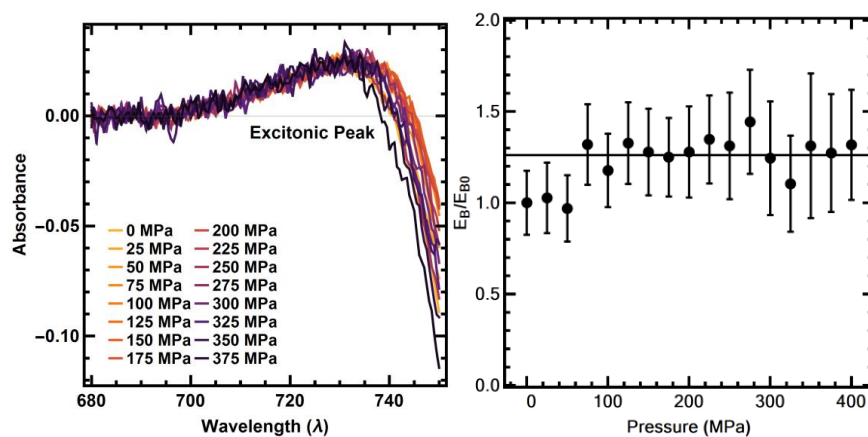

**Fig. S8 Left:** Excitonic peak in absorbance data. No change in height (indicating a change in exciton binding energy) is visible in the raw data. **Right:** Change in exciton binding energy in percent over pressure. No structure is visible, the variation is likely from measurement noise. Black line is the mean, error bars from the noise standard deviation.

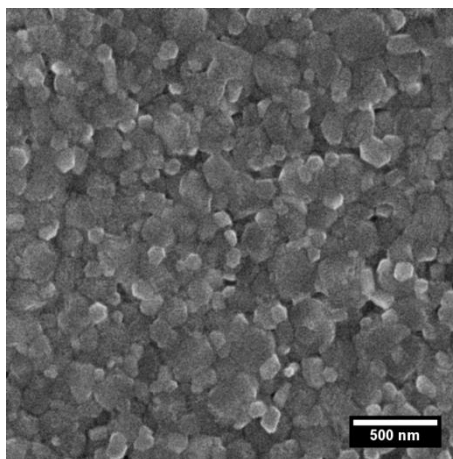

**Fig. S9.** Scanning electron micrograph of MAPI thin film on quartz substrate.

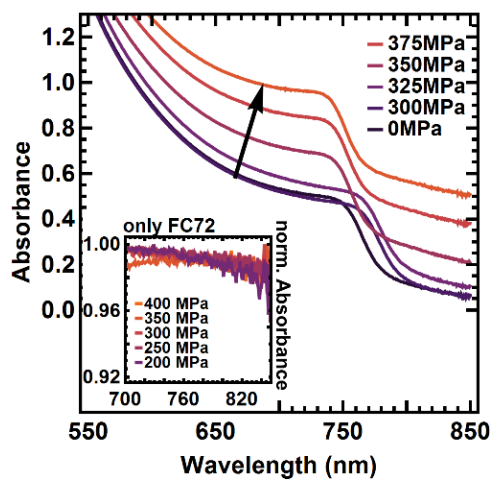

**Fig. S10.** Absorption spectra with transparent and translucent pressure liquid. The inset shows the normalized absorption spectra of the pressure liquid without sample at elevated pressure. The spectral response is flat around the band-edge.

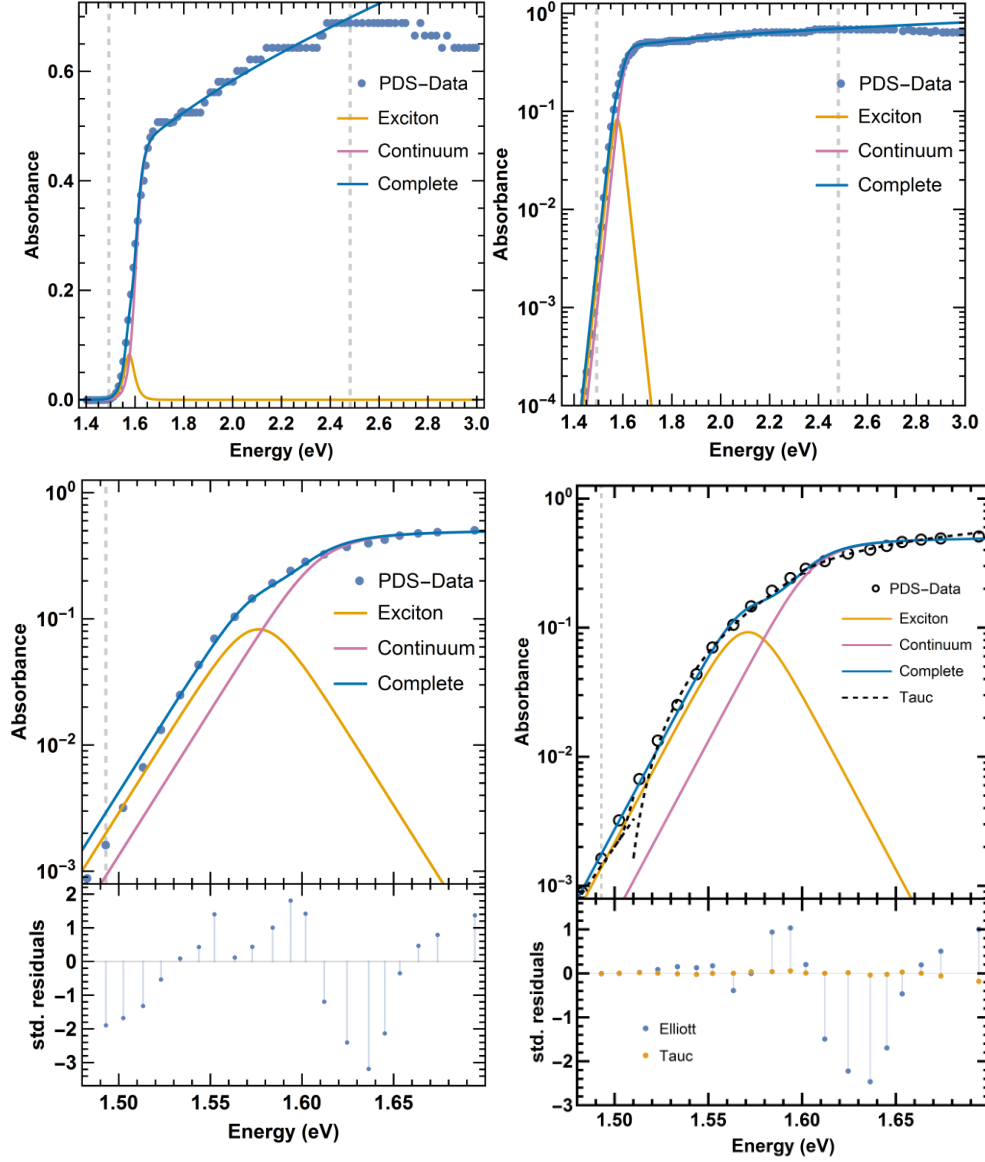

**Fig. S11:** Comparison of Tauc fit and Elliott fit on PDS data of Sadhanala *et al.*. **Left Top:** Best Elliott fit with data in between dashed lines as produced by fitting with Mathematica. **Right Top:** The same fit as before, on a log scale. **Left Bottom:** Zoom in the data of the band edge. The residuals shown in the bottom panel are larger than in the Tauc fit. **Right Bottom:** Manually improved fitting of band edge. The band edge can be fitted better by decreasing the broadening parameter  $\Gamma$  from 19 meV to 16 meV. Fitting the remaining parameters results in the blue fit, which is an overall poorer fit since the high energy region is poorly fitted. The residuals shown

below show a much stronger and systematic deviation of the Elliott formula compared with the Tauc formula of direct and indirect bandgap.

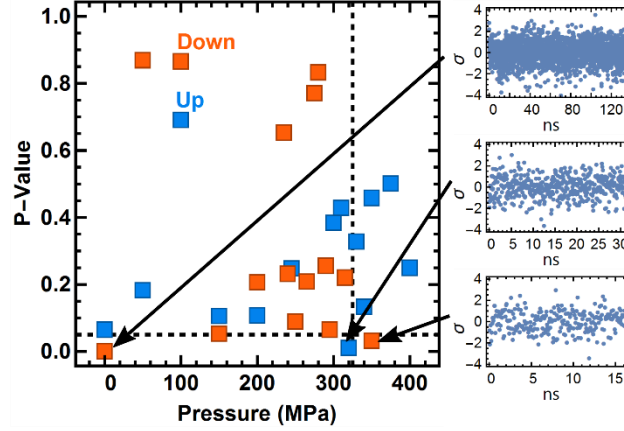

**Fig. S12. Left:** P-values of Cramer-Von Mises test, testing normality for TCSPC fitting at different pressures. Horizontal dashed line is the 5 % significance level, vertical dashed line the phase transition at 325 MPa. **Right:** Standardized residuals of the fit at values below significance level showing outliers.

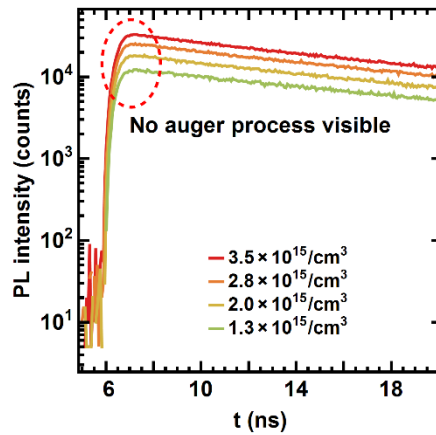

**Fig. S13.** Initial decay of the PL signal at different excitation densities at ambient pressure.

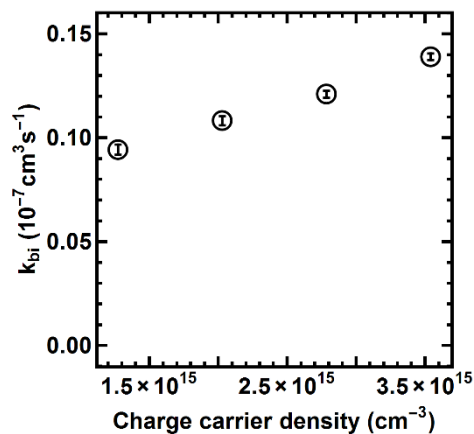

**Fig. S14.** Data seen in **Fig. S13** fitted to our model forcing constant charge carrier density. Because the actual charge carrier density varies, the model has to increase the bimolecular rate to account for a faster onset of decay.

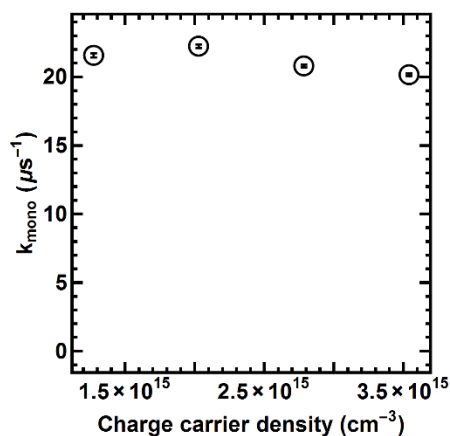

**Fig. S15.** Data seen in **Fig. S13** fitted to our model forcing constant charge carrier density. The monomolecular rate stays largely unaffected by the change in charge carrier density.

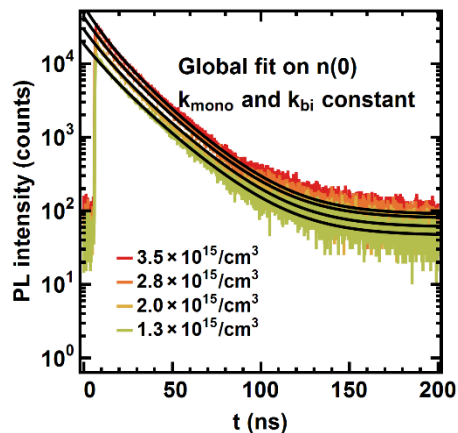

**Fig. S16.** Data shown in Fig. S4 fitted globally while allowing for varying charge carrier density. Both monomolecular and bimolecular rates are fixed to the rates retrieved under ambient pressure. The faster decay onset is reproduced correctly by an increase in charge carrier density.

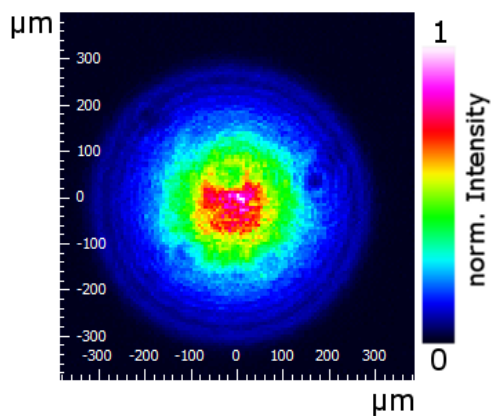

**Fig. S17.** Beam profile measured in air with the same lens and the same lens to sample distance as in the pressure experiment.

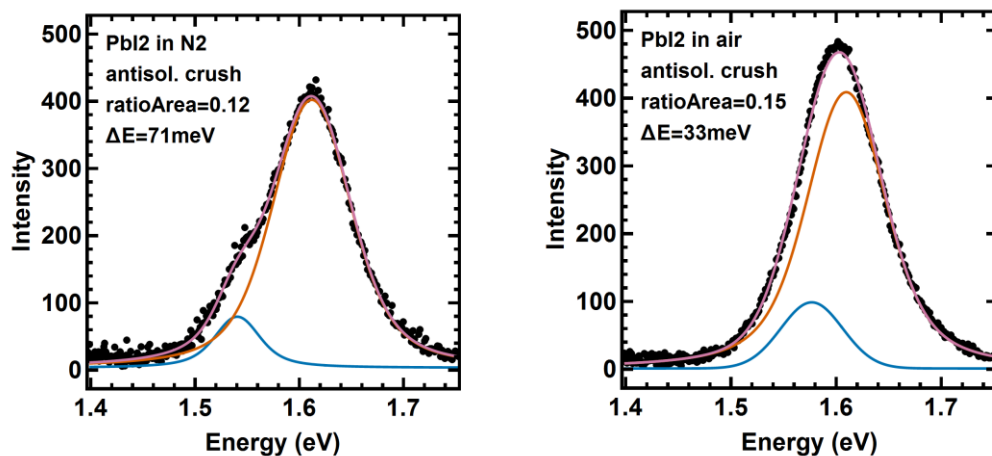

**Fig. S18.** PL spectra of MAPI sample prepared via spincoating with antisolvent precipitation in nitrogen atmosphere and in air at ambient pressures with a fit containing two Voigt profiles.

**Left:** Sample prepared in nitrogen as the sample in the main text; **Right:** Sample prepared in air.

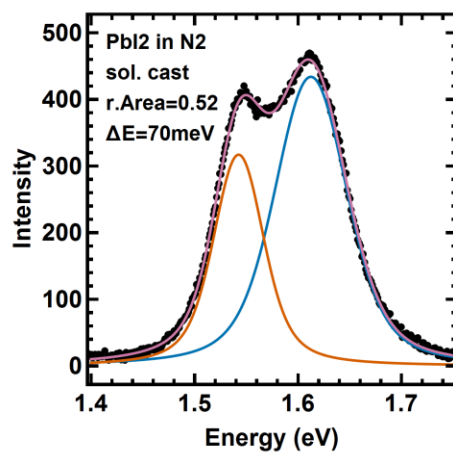

**Fig. S19.** PL spectrum of MAPI sample prepared via solution casting.



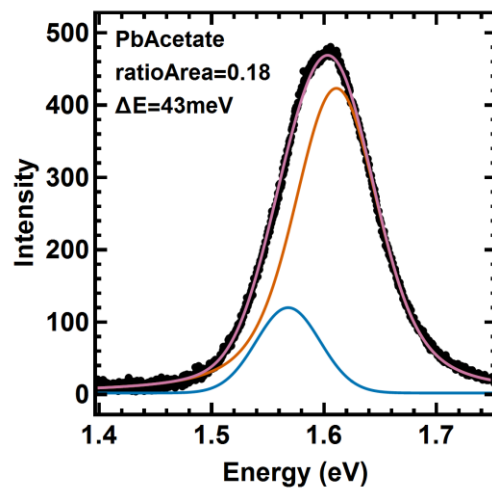

**Fig. S20.** PL spectrum of MAPI sample prepared via spincoating using lead acetate ( $\text{PbAc}_2$ ) as precursor

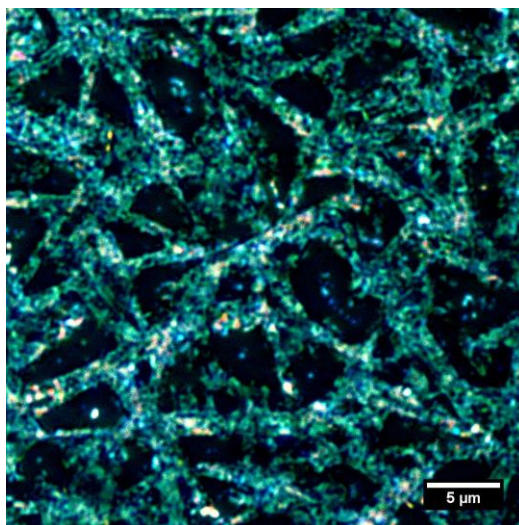

**Fig. S21.** Optical micrograph of MAPI sample prepared via two-step dipping method

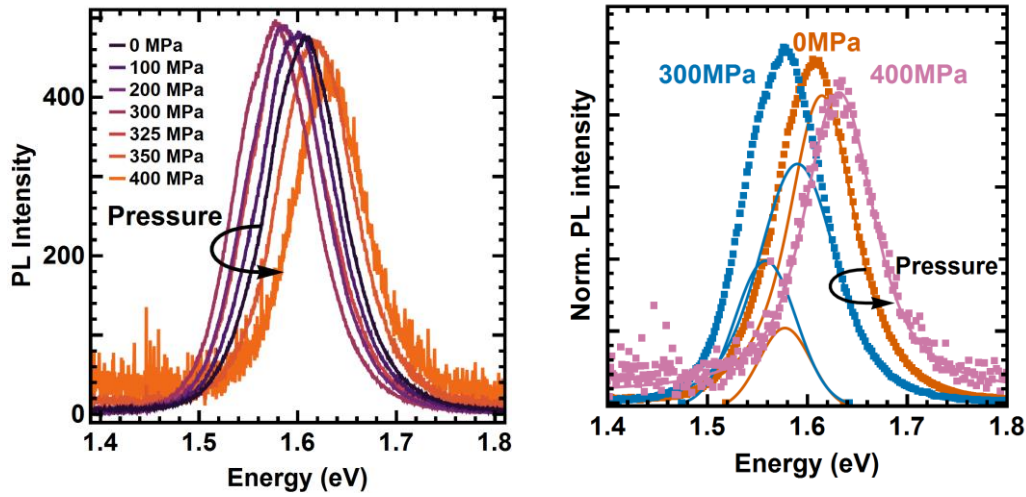

**Fig. S22:** Left: PL spectra of MAPI Sample prepared via two-step dipping over pressure. **Right:** Fits of three characteristic pressures, ambient (0 MPa) just before (320 MPa) and after (400 MPa) phase transition. After phase transition one Voigt profile is sufficient to fit the data well.

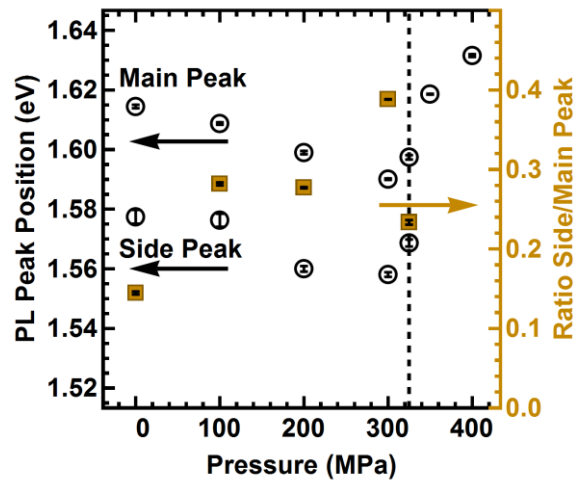

**Fig. S23** Summary of fit results of the dipping sample, showing a similar trend in PL peak positions and ratio of PL peak areas over pressure compared to the trend shown in main text.
